# Supplementary material for: Two sugar beet chitinase genes, BvSP2 and BvSE2, analysed with SNP Amplifluor-like markers, are highly expressed after Fusarium root rot inoculations and field susceptibility trial
Source: PubMed Central journal article supplement (PMC6026450; doi:10.7717/peerj.5127), 2018-06-27
Supplement: peerj-06-5127-s002.pdf [file peerj-06-5127-s002.pdf]

## Supplementary Table S1

### List and origins of the 22 breeding lines and the reference DH line KWS2320

| N  | Breeding lines ID | Origins                                                     |
|----|-------------------|-------------------------------------------------------------|
| 1  | 1002              | Breeding line from hybrid with Ramonskaya, Russia           |
| 2  | 1005              | Breeding line from hybrid with Yaltushkovskaya, Ukraine     |
| 3  | 1017              | Breeding line selected from Veselopodolyanskaya, Ukraine    |
| 4  | 1042              | Breeding line from hybrid with Ramonskaya, Russia           |
| 5  | 1082              | Breeding line from hybrid with Biyskaya, Russia             |
| 6  | 2115              | Breeding line from hybrid with Nemerchanskaya, Ukraine      |
| 7  | 2125              | Breeding line from hybrid with Ramonskaya, Russia           |
| 8  | 2154              | Breeding line from hybrid with Pervomaiskaya, Russia        |
| 9  | 2172              | Breeding line from hybrid with Ramonskaya, Russia           |
| 10 | 2182              | Breeding line from hybrid with Biyskaya, Russia             |
| 11 | 2190              | Breeding line from hybrid with Ramonskaya, Russia           |
| 12 | 2210              | Breeding line from hybrid with Veselopodolyanskaya, Ukraine |
| 13 | 2217              | Breeding line selected from Veselopodolyanskaya, Ukraine    |
| 14 | 2236              | Breeding line from hybrid with Kazakhstanskiy, Kazakhstan   |
| 15 | 2261              | Breeding line from hybrid with Kazakhstanskiy, Kazakhstan   |
| 16 | 2262              | Breeding line from hybrid with Ramonskaya, Russia           |
| 17 | 2263              | Breeding line from hybrid with Nemerchanskaya, Ukraine      |
| 18 | 2281              | Breeding line from hybrid with Kubanskiy, Russia            |
| 19 | 2282              | Breeding line from hybrid with Belotzerkovskaya, Ukraine    |
| 20 | 2286              | Breeding line from hybrid with Ligovskaya, Russia           |
| 21 | 2296              | Breeding line from hybrid with Belotzerkovskaya, Ukraine    |
| 22 | 2300              | Breeding line selected from Veselopodolyanskaya, Ukraine    |
| 23 | KWS2320           | Reference DH line KWS2320, KWS SAAT SE, Germany             |

## Supplementary Figure S1

### Sequence of the *BvSE2* gene, encoding chitinase, Class III, annotated for the reference DH line KWS2320

Start-codon (in green) and Stop-codon (in red) indicate an ORF of 882 bp. Primers for Sanger sequencing are shown in yellow with a fragment size of 1,076 bp. Position of SNP [W = A/T] with original allele 'A' from KWS2320 and SNP allele 'T' is indicated in dark blue. The gene-specific marker, KIZ4, contains two Forward primers with 3'-end on the SNP (shown in light blue) and common Reverse primer (shown in purple). The amplified product for SNP Amplifluor-like analysis is 81 bp.

>gi|731321417|ref|XM\_010673039.1| PREDICTED: *Beta vulgaris* subsp. *vulgaris* acidic endochitinase SE2 (LOC104888158), mRNA KWS2320, chromosome 3

```
GAAACACTGTTTAAAGTTTAGGATATAAAATAGCATACATAGATCACGCGTTTTTTTAAACAGGTACAAGAAT
TTTCTGTCTACCCCTTCGGGTACTAAGACTACGCCAGCATGTCTTCCGTGAAGAGGAAGAGCAATGCTG
CCAAGTACGCTAGAGGCCTACAACCTATTGGTAGGAGGATCCTTATTTTTGTTTCAGCATACTGTAGAGCC
CAATTCCAGAAAAGTATCCCTACAGCATTTAAGCTTCTGCATTCCCATTTGTAGAAAAAGAGCCTCTTTGA
CTAGACTTTCCAAGCAAACCTTTTTAGACAATTTCTCCCACCTTTACAGCCTTTTCGAAATACGCAAAACTC
ATTGACTCATTGACTCTAACATCTATAAAATTTCTACTTACCCAACCTTAAATCTCACAACCCAAGCACT
GCATTGCATAGTTGCACATACGTACCCAAAAACAAGCATGGCAGCCAAAAATAGTGTTCAGTTCTATTCCTGA
TTTCTCTCTTAATCTTTGCTTCATTTCGAGTCCCTCTCATGGCTCCCAAATTTGCATATACTGGGGCCAAAA
TGGTGATGAAGGAAGTCTTGCTGACACTTGTAACCTCCGAAACTACGGTACCGTGATCCTAGCTTTTCGTA
GCTACCTTTGGTAACGGGCAAACCCCGCGCTGAACCTTAGCTGGGCACTGTGACCCTGTACAAAATTGTA
ACAGTCTGAGCAGTGACATCAAAAACATGCCAACAGGCAGGCATTAAGGTACTCCTCTCTATAGGAGGTGG
TGCCGGAGGCTATTCTCTTTCCTCAACCGATGATGCAAACACATTTGCTGATTACCTCTGGACACTTAT
CTTGGGGGTCAGTCCAGCACCCGACCCCTTGGAGATGCAGTTTTTGGATGGTATTGATTTTCGATATCGAGA
GTGGTGATGGCAGATTTTGGGATGACCTAGCTAGAGCATTGGCAGGTCATAACAATGGTCAGAAAACAGT
GTAATTATCAGCAGCTCCTCAATGTCCCTTCCAGATGCCAGCTTAAGCACTGCCATAGCCACAGGCCTA
TTCGACTATGTATGGGTTTCAGTTCTACAACAACCCCTTGTCAATATGATACCAGCGCTGATAATCTCT
TGAGCTCGTGGAACCAAGTGGACTACAGTACAAGCTAACCAGATCTTCTCCGACTACCAGCATCAACTGA
TGCTGCCGGCAGTGGTTTTATTCCAGCAGATGCTCTTACATCTCAAGTCTTCCACTATCAAGGGTTCT
GCTAAATATGGAGGAGTCATGCTATGGTCAAAGGCATATGACAGTGGGTACAGCAGTGCTATTTAAAGCA
GTGTTTAATTTAAATTACTAGTGTATCCAAAGATATAGGTACAAAATAAGTTATAGAGATACATCAAAAA
ACCATCTTAGTTTTAAATTTTTTATGCACCACAAAAGCTTGTAATACTAATATACTATTATCATAAATGG
CTTATTGCCTCGCTATATTTTTGGTGATTATTATATACACAGTTTACAACCTTCGCAA
```

## Supplementary Figure S2

### Sequence of the *BvSP2* gene, encoding chitinase, Class IV, annotated for the reference DH line KWS2320

Start-codon (in green) and Stop-codon (in red) indicate an ORF of 867 bp. Primers for Sanger sequencing are shown in yellow with fragment size of 1,609 bp. Position of SNP [Y = C/T] with original allele 'C' from KWS2320 and SNP allele 'T' is indicated in dark blue. The gene-specific marker, KIZ3, contains two Forward primers with 3'-end on the SNP (shown in light blue) and common Reverse primer (shown in purple). The size of amplified product for SNP Amplifluor-like analysis is 79 bp.

>gi|731323202|ref|XM\_010673997.1| PREDICTED: *Beta vulgaris* subsp. *vulgaris* acidic endochitinase SP2 (LOC104888888), mRNA KWS2320, chromosome 3

```
AAATCACATAATCTTCTCATCAA AACAAAAC TACCCAAAAAAA ATG GCACTTCTTTGAAAAACACCTT
ATATTTAGCCTTAATCATCTCAGTAATCTCATCATTCCCAACTTCATTGTTTGCACAAAACGTGGGTGT
GCCCCTAACCTATGCTGCAGCAAATTTGGGTCTGTGGCACTGGAACACCTTATGTGGTGTGGTAACT
GTCAATCTGGCCCATGTGAGGGTGGCACTCCAAC TACGCCGCAACTCCAACCACTCCTACTACGCCAGG
AACTGGTGGTGGTGGCTCATCAGTGTCTGATATAGTGAGTCAAGCATTCT TTGATGGGATTATAGGCCAA
GCTGCTGCATCTTGTCTGGGAAAAACTTCTACACTCG GCTGCTTTTCTTAGTGCTGT TGATCCTAAGT
TCGGAAACGAAGTTCCAGTGATGATAACAAGAGAGAAATCGCTGCCTTCTTTGCTCATATCTCGCATGA
GACTACCAATTTGTGCCACATAGAAGAAAGAGATGGAGATGTTGGTGACGCCTACTGCGATCAAGACAAG
GCAGCTCAATACCCTTGCCTGCAGGCAAGAAGTACTTCGGGAGAGGACCTCTTCAACTGTCATGGAAC
ACAAC TATGCTCTTGCAGGACAGGCGATTGGATTTGATGGTCTTGGAAACCCTGAAAAGGTGGCTACTGA
TGTTAATACATCTTTCAAGGCTGCAATGTGGTTTTGGATGACTAATGTTCACTCCGTTATGAACCAAGGT
TTTTGGAGCTACCACCAAAGCTATTAATGGCGCGCTTGAATGCAATGGCCAAAACCAGGATCAAGCCAATG
ACCGTATTCAGTTTTATAAGAAGTATTGTGCTGATTTTGGTGTGCTCCTGGTGATAATCTTACATGT TA
ATTTTCGACAAGTTACAAGTATATCTCAATATAGTACTTCTATATGATATATACATTCATGTTTATTAGTT
GCACTGAGGTATAATTTACTGAATAAAACACAGATACTATGTAGTACTAGAATGTTGTTCTTCTTGATC
TTGCTATGAACAATGAATATATAATAAAA AGGAATTACATGAGCATTCTA
```

## Supplementary Table S2

### Primers used for qRT-PCR and their amplification products

| Gene name            | Primer name | Sequence (5' – 3')       | Size of amplicon (bp) |
|----------------------|-------------|--------------------------|-----------------------|
| Chitinase <i>SE2</i> | SE2-F       | CCGGAGGCTATTCTCTTTCC     | 81                    |
|                      | SE2-R       | ACTGACCCCCAAGATAAGTG     |                       |
| Chitinase <i>SP2</i> | SP2-F       | TTGATGGGATTATAGGCCAAG    | 79                    |
|                      | SP2-R       | ACAGCACTAAGAAAAGCAGC     |                       |
| Glutamine synthetase | GS-F        | GACCTCCATATTACTGAAAGGAAG | 118                   |
|                      | GS-R        | GAGTAATTGCTCCATCCTGTTCA  |                       |
