# Supplementary material for: Two sugar beet chitinase genes, BvSP2 and BvSE2, analysed with SNP Amplifluor-like markers, are highly expressed after Fusarium root rot inoculations and field susceptibility trial
Source: PeerJ. 2018 Jun 27;6:e5127. doi: 10.7717/peerj.5127 (PMC6026450; doi:10.7717/peerj.5127)
Supplement: Supplemental Information 1 [file peerj-06-5127-s001.xlsx]

## Sheet: Fig2-raw-data
	Well	Fluor 1	Fluor 2	Content	RFU1	RFU2	Call	Status			Well	Fluor 1	Fluor 2	Content	RFU1	RFU2	Call	Status
BvSP2	A01	FAM	VIC	1	3.479	5.162	Allele 2	Auto		BvSE2	A01	FAM	VIC	1	3.482	5.165	Heterozygote	Auto
	A02	FAM	VIC	2	3.51	5.218	Allele 2	Auto			A02	FAM	VIC	2	3.521	5.025	Allele 1	Auto
	A03	FAM	VIC	3	3.579	5.335	Heterozygote	Auto			A03	FAM	VIC	3	3.365	5.031	Allele 2	Auto
	A04	FAM	VIC	4	3.596	5.278	Heterozygote	Auto			A04	FAM	VIC	4	3.522	5.025	Allele 1	Auto
	A05	FAM	VIC	5	3.535	5.04	Allele 1	Auto			A05	FAM	VIC	5	3.363	5.1	Allele 2	Auto
	A06	FAM	VIC	6	3.559	5.295	Heterozygote	Auto			A06	FAM	VIC	6	3.358	4.985	Allele 2	Auto
	A07	FAM	VIC	7	3.562	5.061	Allele 1	Auto			A07	FAM	VIC	7	3.43	5.21	Heterozygote	Auto
	A08	FAM	VIC	8	3.515	5.085	Allele 1	Auto			A08	FAM	VIC	8	3.4	4.992	Allele 1	Auto
	A09	FAM	VIC	9	3.583	5.25	Heterozygote	Auto			A09	FAM	VIC	9	3.482	5.105	Allele 1	Auto
	A10	FAM	VIC	10	3.599	5.262	Heterozygote	Auto			A10	FAM	VIC	10	3.381	5.131	Allele 2	Auto
	A11	FAM	VIC	11	3.545	5.135	Allele 1	Auto			A11	FAM	VIC	11	3.521	4.95	Allele 1	Auto
	A12	FAM	VIC	12	3.495	5.232	Allele 2	Auto			A12	FAM	VIC	12	3.43	4.935	Allele 1	Auto
	B01	FAM	VIC	13	3.562	5.28	Heterozygote	Auto			B01	FAM	VIC	13	3.362	5.119	Allele 2	Auto
	B02	FAM	VIC	14	3.584	5.125	Allele 1	Auto			B02	FAM	VIC	14	3.381	5.21	Allele 2	Auto
	B03	FAM	VIC	15	3.564	5.15	Allele 1	Auto			B03	FAM	VIC	15	3.555	5.11	Heterozygote	Auto
	B04	FAM	VIC	16	3.479	5.325	Allele 2	Auto			B04	FAM	VIC	16	3.475	4.97	Allele 1	Auto
	B05	FAM	VIC	17	3.48	5.158	Allele 2	Auto			B05	FAM	VIC	17	3.358	5.175	Allele 2	Auto
	B06	FAM	VIC	18	3.56	5.111	Allele 1	Auto			B06	FAM	VIC	18	3.355	5.205	Allele 2	Auto
	B07	FAM	VIC	19	3.582	5.014	Allele 1	Auto			B07	FAM	VIC	19	3.478	5.2	Heterozygote	Auto
	B08	FAM	VIC	20	3.475	5.368	Allele 2	Auto			B08	FAM	VIC	20	3.461	5.1	Heterozygote	Auto
	B09	FAM	VIC	21	3.478	5.285	Allele 2	Auto			B09	FAM	VIC	21	3.519	4.905	Allele 1	Auto
	B10	FAM	VIC	22	3.581	5.34	Heterozygote	Auto			B10	FAM	VIC	22	3.359	5.02	Allele 2	Auto
	B11	FAM	VIC	23	3.482	5.188	Allele 2	Auto			B11	FAM	VIC	23	3.442	4.125	Heterozygote	Auto
	B12	FAM	VIC	24	3.472	5.114	Allele 2	Auto			B12	FAM	VIC	24	3.445	5.195	Heterozygote	Auto
	C01	FAM	VIC	25	3.521	5.065	Allele 1	Auto			C01	FAM	VIC	25	3.462	5.125	Heterozygote	Auto
	C02	FAM	VIC	26	3.482	5.156	Allele 2	Auto			C02	FAM	VIC	26	3.519	5.032	Allele 1	Auto
	C03	FAM	VIC	27	3.579	5.28	Heterozygote	Auto			C03	FAM	VIC	27	3.339	4.995	Allele 1	Auto
	C04	FAM	VIC	28	3.542	5.064	Allele 1	Auto			C04	FAM	VIC	28	3.445	5.095	Heterozygote	Auto
	C05	FAM	VIC	NTC	3.475	5.015	NTC	Auto			C05	FAM	VIC	NTC	3.355	4.89	NTC	Auto
	C06	FAM	VIC								C06	FAM	VIC
	C07	FAM	VIC								C07	FAM	VIC
	C08	FAM	VIC								C08	FAM	VIC
	C09	FAM	VIC								C09	FAM	VIC
	C10	FAM	VIC								C10	FAM	VIC
	C11	FAM	VIC								C11	FAM	VIC
	C12	FAM	VIC								C12	FAM	VIC
	D01	FAM	VIC								D01	FAM	VIC
	D02	FAM	VIC								D02	FAM	VIC
	D03	FAM	VIC								D03	FAM	VIC
	D04	FAM	VIC								D04	FAM	VIC
	D05	FAM	VIC								D05	FAM	VIC
	D06	FAM	VIC								D06	FAM	VIC
	D07	FAM	VIC								D07	FAM	VIC
	D08	FAM	VIC								D08	FAM	VIC
	D09	FAM	VIC								D09	FAM	VIC
	D10	FAM	VIC								D10	FAM	VIC
	D11	FAM	VIC								D11	FAM	VIC
	D12	FAM	VIC								D12	FAM	VIC
	E01	FAM	VIC								E01	FAM	VIC
	E02	FAM	VIC								E02	FAM	VIC
	E03	FAM	VIC								E03	FAM	VIC
	E04	FAM	VIC								E04	FAM	VIC
	E05	FAM	VIC								E05	FAM	VIC
	E06	FAM	VIC								E06	FAM	VIC
	E07	FAM	VIC								E07	FAM	VIC
	E08	FAM	VIC								E08	FAM	VIC
	E09	FAM	VIC								E09	FAM	VIC
	E10	FAM	VIC								E10	FAM	VIC
	E11	FAM	VIC								E11	FAM	VIC
	E12	FAM	VIC								E12	FAM	VIC
	F01	FAM	VIC								F01	FAM	VIC
	F02	FAM	VIC								F02	FAM	VIC
	F03	FAM	VIC								F03	FAM	VIC
	F04	FAM	VIC								F04	FAM	VIC
	F05	FAM	VIC								F05	FAM	VIC
	F06	FAM	VIC								F06	FAM	VIC
	F07	FAM	VIC								F07	FAM	VIC
	F08	FAM	VIC								F08	FAM	VIC
	F09	FAM	VIC								F09	FAM	VIC
	F10	FAM	VIC								F10	FAM	VIC
	F11	FAM	VIC								F11	FAM	VIC
	F12	FAM	VIC								F12	FAM	VIC
	G01	FAM	VIC								G01	FAM	VIC
	G02	FAM	VIC								G02	FAM	VIC
	G03	FAM	VIC								G03	FAM	VIC
	G04	FAM	VIC								G04	FAM	VIC
	G05	FAM	VIC								G05	FAM	VIC
	G06	FAM	VIC								G06	FAM	VIC
	G07	FAM	VIC								G07	FAM	VIC
	G08	FAM	VIC								G08	FAM	VIC
	G09	FAM	VIC								G09	FAM	VIC
	G10	FAM	VIC								G10	FAM	VIC
	G11	FAM	VIC								G11	FAM	VIC
	G12	FAM	VIC								G12	FAM	VIC
	H01	FAM	VIC								H01	FAM	VIC
	H02	FAM	VIC								H02	FAM	VIC
	H03	FAM	VIC								H03	FAM	VIC
	H04	FAM	VIC								H04	FAM	VIC
	H05	FAM	VIC								H05	FAM	VIC
	H06	FAM	VIC								H06	FAM	VIC
	H07	FAM	VIC								H07	FAM	VIC
	H08	FAM	VIC								H08	FAM	VIC
	H09	FAM	VIC								H09	FAM	VIC
	H10	FAM	VIC								H10	FAM	VIC
	H11	FAM	VIC								H11	FAM	VIC
	H12	FAM	VIC								H12	FAM	VIC

## Sheet: Fig3-raw-data
				BvSP2								BvSE2
		Line	Days	Replicate 1	Replicate 2	Average	SD=SE			Line	Days	Replicate 1	Replicate 2	Average	SD=SE
	A	2182	0	274982	320413	297698	32124.6		A	2182	0	21295	313435	167365	206574
			14	25325599	33160519	29243059	5.54013e+06				14	60558	264888	162723	144483
			18	1155737	1836227	1495982	481179				18	55737	78458	67097.5	16066.2
		2236	0	430475	567552	499014	96928.1			2236	0	208559	38245	123402	120430
			14	45219104	29639030	37429067	1.10168e+07				14	3647256	2195884	2921570	1.02627e+06
			18	2317267	1799151	2058209	366363				18	67443	344756	206100	196090
		2210	0	451345	54986	253166	280268			2210	0	37566	136785	87175.5	70158.4
			14	5740439	4830201	5285320	643635				14	404778	1894886	1149832	1.05367e+06
			18	24426058	18406566	21416312	4.25642e+06				18	48889	339535	194212	205518
		KWS2320	0	340572	258359	299466	58133.4			KWS2320	0	2799	235543	119171	164575
			14	27030165	14665129	20847647	8.7434e+06				14	584665	1093746	839206	359975
			18	92765	224779	158772	93348				18	92765	294779	193772	142845
	B	2182	C	194747	63857	129302	92553.2		B	2182	C	47364	83375	65369.5	25463.6
			I	228678	184766	206722	31050.5				I	255746	184766	220256	50190.4
		2236	C	139957	95385	117671	31517.2			2236	C	156597	84553	120575	50942.8
			I	270477	183662	227070	61387.5				I	1834552	1444320	1639436	275936
		2210	C	139957	176492	158224	25834.1			2210	C	184673	18960	101816	117177
			I	383662	260462	322062	87115.6				I	253886	317355	285620	44879.4
		KWS2320	C	147562	100473	124018	33297			KWS2320	C	63855	105545	84700	29479.3
			I	269745	138472	204108	92824				I	174633	83773	129203	64247.7
